# Supplementary material for: Proteome and Interactome Linked to Metabolism, Genetic Information Processing, and Abiotic Stress in Gametophytes of Two Woodferns
Source: MDPI journal article supplement (doi:10.3390/ijms241512429), 2023-08-04
Supplement: s1 [file s1]

**Table S1.** Strongest STRING interactions of proteins extracted from gametophytes of *Dryopteris affinis* and *D. oreades* and classified in the following groups: metabolism of carbohydrates, biosynthesis of amino acids, metabolism of energy and of secondary compounds, transcription and translation, and transport.

| Node 1                                   | Node 2           | Neighborhood | Gene fusion | Co-occurrence | Co-expression | Experiments | Database | Textmining | Score |
|------------------------------------------|------------------|--------------|-------------|---------------|---------------|-------------|----------|------------|-------|
| <b>METABOLISM OF CARBOHYDRATES</b>       |                  |              |             |               |               |             |          |            |       |
| <i>AT2G20420</i>                         | <i>AT5G08300</i> | 0.19         | 0.389       | 0.448         | 0.949         | 0.969       | 0.949    | 0.965      | 0.999 |
| <i>AT2G20420</i>                         | <i>AT4G26910</i> | 0.162        | 0           | 0             | 0.916         | 0.526       | 0.974    | 0.714      | 0.999 |
| <i>AT4G26910</i>                         | <i>AT5G08300</i> | 0.189        | 0.007       | 0             | 0.926         | 0.374       | 0.972    | 0.637      | 0.999 |
| <i>At1g01090</i>                         | <i>MAB1</i>      | 0            | 0.69        | 0.447         | 0.903         | 0.942       | 0.934    | 0.817      | 0.999 |
| <i>At1g59900</i>                         | <i>MAB1</i>      | 0            | 0.454       | 0.448         | 0.903         | 0.942       | 0.934    | 0.823      | 0.999 |
| <i>PGK1</i>                              | <i>TPI</i>       | 0.19         | 0.517       | 0             | 0.91          | 0.419       | 0.932    | 0.729      | 0.999 |
| <i>AT1G54220</i>                         | <i>MAB1</i>      | 0.173        | 0.005       | 0.422         | 0.838         | 0.771       | 0.867    | 0.776      | 0.999 |
| <b>BIOSYNTHESIS OF AMINO ACIDS</b>       |                  |              |             |               |               |             |          |            |       |
| <i>AT3G23940</i>                         | <i>IMS1</i>      | 0.19         | 0           | 0.238         | 0.254         | 0           | 0.973    | 0.803      | 0.997 |
| <i>III1</i>                              | <i>IMD2</i>      | 0.173        | 0.102       | 0.369         | 0.468         | 0.195       | 0.973    | 0.544      | 0.996 |
| <i>AT1G11860</i>                         | <i>SHM3</i>      | 0.19         | 0           | 0             | 0.336         | 0.692       | 0.932    | 0.563      | 0.994 |
| <i>III1</i>                              | <i>IMS1</i>      | 0.185        | 0           | 0             | 0.455         | 0.214       | 0.973    | 0.43       | 0.993 |
| <i>ATMS1</i>                             | <i>MTO3</i>      | 0.19         | 0           | 0             | 0.714         | 0.061       | 0.884    | 0.761      | 0.992 |
| <b>METABOLISM OF ENERGY</b>              |                  |              |             |               |               |             |          |            |       |
| <i>AGT</i>                               | <i>GOX2</i>      | 0            | 0           | 0             | 0.961         | 0.647       | 0.966    | 0.684      | 0.999 |
| <i>ATPC1</i>                             | <i>ATPE</i>      | 0.19         | 0           | 0             | 0.908         | 0.867       | 0.843    | 0.615      | 0.999 |
| <i>ATPC1</i>                             | <i>PB</i>        | 0.173        | 0           | 0.432         | 0.901         | 0.905       | 0.896    | 0.612      | 0.999 |
| <i>ATPE</i>                              | <i>PB</i>        | 0.18         | 0.15        | 0             | 0.985         | 0.646       | 0.837    | 0.966      | 0.999 |
| <i>ATP1</i>                              | <i>ATPC1</i>     | 0.19         | 0           | 0.395         | 0.903         | 0.846       | 0.834    | 0.673      | 0.999 |
| <i>PSAA</i>                              | <i>PSAC</i>      | 0            | 0           | 0.33          | 0.503         | 0.995       | 0.8      | 0.977      | 0.999 |
| <i>ATP1</i>                              | <i>ATPE</i>      | 0.19         | 0           | 0             | 0.906         | 0.736       | 0.843    | 0.916      | 0.999 |
| <i>ATPA</i>                              | <i>ATPC1</i>     | 0.19         | 0           | 0.421         | 0.903         | 0.919       | 0.834    | 0.647      | 0.999 |
| <i>ATPA</i>                              | <i>ATPE</i>      | 0.19         | 0           | 0             | 0.931         | 0.736       | 0.843    | 0.922      | 0.999 |
| <i>PSBO2</i>                             | <i>PSBP-1</i>    | 0            | 0           | 0             | 0.888         | 0.669       | 0.36     | 0.992      | 0.999 |
| <i>ATPA</i>                              | <i>PB</i>        | 0.173        | 0           | 0.445         | 0.957         | 0.905       | 0.829    | 0.969      | 0.999 |
| <i>AT5G08680</i>                         | <i>ATPC1</i>     | 0.173        | 0           | 0.427         | 0.901         | 0.818       | 0.829    | 0.587      | 0.999 |
| <b>METABOLISM OF SECONDARY COMPOUNDS</b> |                  |              |             |               |               |             |          |            |       |
| <i>4CL3</i>                              | <i>TT5</i>       | 0            | 0           | 0             | 0.843         | 0           | 0        | 0.685      | 0.948 |
| <i>4CL3</i>                              | <i>PAL1</i>      | 0.08         | 0           | 0             | 0.145         | 0           | 0.745    | 0.763      | 0.946 |
| <i>4CL3</i>                              | <i>PAL4</i>      | 0.08         | 0           | 0             | 0.041         | 0           | 0.745    | 0.717      | 0.928 |

| Node 1                                    | Node 2           | Neighborhood | Gene fusion | Co-occurrence | Co-expression | Experiments | Database | Textmining | Score |
|-------------------------------------------|------------------|--------------|-------------|---------------|---------------|-------------|----------|------------|-------|
| METABOLISM OF SECONDARY COMPOUNDS (Cont.) |                  |              |             |               |               |             |          |            |       |
| <i>PAL1</i>                               | <i>PAL4</i>      | 0            | 0           | 0.449         | 0.167         | 0.787       | 0        | 0.911      | 0.819 |
| TRANSCRIPTION AND TRANSLATION             |                  |              |             |               |               |             |          |            |       |
| <i>AT1G26880</i>                          | <i>AT1G27400</i> | 0.19         | 0           | 0             | 0.986         | 0.867       | 0.665    | 0.415      | 0.999 |
| <i>AT1G26880</i>                          | <i>RPL5B</i>     | 0.19         | 0           | 0             | 0.968         | 0.867       | 0.667    | 0.391      | 0.999 |
| <i>AT1G26880</i>                          | <i>AT4G10450</i> | 0.19         | 0           | 0             | 0.982         | 0.847       | 0.643    | 0.536      | 0.999 |
| <i>AT1G26880</i>                          | <i>RPL23AB</i>   | 0.19         | 0           | 0             | 0.986         | 0.867       | 0.665    | 0.848      | 0.999 |
| <i>AT1G26880</i>                          | <i>AT2G37190</i> | 0            | 0           | 0             | 0.986         | 0.847       | 0.64     | 0.106      | 0.999 |
| <i>AT1G26880</i>                          | <i>AT1G77940</i> | 0            | 0           | 0             | 0.977         | 0.82        | 0.638    | 0.479      | 0.999 |
| <i>AT1G26880</i>                          | <i>AT2G34480</i> | 0            | 0           | 0             | 0.982         | 0.82        | 0.639    | 0.327      | 0.999 |
| <i>AT1G26880</i>                          | <i>AT3G62870</i> | 0            | 0           | 0             | 0.982         | 0.867       | 0.656    | 0.326      | 0.999 |
| <i>AT1G26880</i>                          | <i>AT3G05560</i> | 0            | 0           | 0             | 0.985         | 0.847       | 0.488    | 0.411      | 0.999 |
| <i>AT1G26880</i>                          | <i>AT2G20450</i> | 0.182        | 0           | 0             | 0.986         | 0.867       | 0.665    | 0.894      | 0.999 |
| <i>AT1G26880</i>                          | <i>AT2G37600</i> | 0            | 0           | 0             | 0.983         | 0.847       | 0.651    | 0.511      | 0.999 |
| <i>AT1G26880</i>                          | <i>AT4G15000</i> | 0.182        | 0           | 0             | 0.985         | 0.847       | 0.649    | 0.577      | 0.999 |
| <i>AT1G26880</i>                          | <i>RPL18</i>     | 0            | 0           | 0             | 0.986         | 0.847       | 0.648    | 0.416      | 0.999 |
| <i>AT1G26880</i>                          | <i>AT1G41880</i> | 0            | 0           | 0             | 0.985         | 0.82        | 0.638    | 0.172      | 0.999 |
| <i>AT1G27400</i>                          | <i>AT1G41880</i> | 0            | 0           | 0             | 0.985         | 0.853       | 0.661    | 0.393      | 0.999 |
| <i>AT1G27400</i>                          | <i>RPL18</i>     | 0            | 0           | 0             | 0.986         | 0.867       | 0.673    | 0.494      | 0.999 |
| <i>AT1G27400</i>                          | <i>AT4G15000</i> | 0.173        | 0           | 0             | 0.985         | 0.867       | 0.673    | 0.51       | 0.999 |
| <i>AT1G27400</i>                          | <i>AT2G37600</i> | 0            | 0           | 0             | 0.98          | 0.867       | 0.673    | 0.155      | 0.999 |
| <i>AT1G27400</i>                          | <i>AT2G20450</i> | 0.173        | 0           | 0             | 0.986         | 0.877       | 0.676    | 0.599      | 0.999 |
| <i>AT1G27400</i>                          | <i>AT3G05560</i> | 0            | 0           | 0             | 0.985         | 0.867       | 0.673    | 0.516      | 0.999 |
| <i>AT1G27400</i>                          | <i>AT5G58420</i> | 0.19         | 0           | 0.385         | 0.986         | 0.867       | 0        | 0.594      | 0.999 |
| <i>AT1G27400</i>                          | <i>AT3G62870</i> | 0.161        | 0           | 0             | 0.985         | 0.877       | 0.676    | 0.723      | 0.999 |
| <i>AT1G27400</i>                          | <i>AT2G34480</i> | 0            | 0           | 0             | 0.986         | 0.853       | 0.661    | 0.678      | 0.999 |
| <i>AT1G27400</i>                          | <i>AT2G37190</i> | 0.178        | 0           | 0.281         | 0.986         | 0.867       | 0.673    | 0.33       | 0.999 |
| <i>AT1G27400</i>                          | <i>RPL23AB</i>   | 0.185        | 0           | 0.346         | 0.986         | 0.877       | 0.676    | 0.598      | 0.999 |
| <i>AT1G27400</i>                          | <i>AT4G36130</i> | 0.171        | 0           | 0.319         | 0.944         | 0.853       | 0.661    | 0.547      | 0.999 |
| <i>AT1G27400</i>                          | <i>AT4G10450</i> | 0.181        | 0           | 0.367         | 0.966         | 0.867       | 0.673    | 0.826      | 0.999 |
| <i>AT1G27400</i>                          | <i>RPL5B</i>     | 0.19         | 0           | 0             | 0.977         | 0.877       | 0.676    | 0.546      | 0.999 |
| <i>AT1G27400</i>                          | <i>AT3G52580</i> | 0.181        | 0           | 0.292         | 0.986         | 0.867       | 0.143    | 0.323      | 0.999 |
| <i>AT1G27400</i>                          | <i>AT3G09630</i> | 0.175        | 0           | 0.261         | 0.968         | 0.877       | 0.676    | 0.778      | 0.999 |
| <i>AT1G41880</i>                          | <i>RPL23AB</i>   | 0            | 0           | 0             | 0.986         | 0.853       | 0.661    | 0.247      | 0.999 |

| Node 1                                         | Node 2    | Neighborhood | Gene fusion | Co-occurrence | Co-expression | Experiments | Database | Textmining | Score |
|------------------------------------------------|-----------|--------------|-------------|---------------|---------------|-------------|----------|------------|-------|
| TRANSCRIPTION AND TRANSLATION ( <i>Cont.</i> ) |           |              |             |               |               |             |          |            |       |
| AT1G41880                                      | RPL18     | 0            | 0           | 0             | 0.985         | 0.82        | 0.645    | 0.382      | 0.999 |
| AT1G41880                                      | AT4G15000 | 0            | 0           | 0             | 0.985         | 0.82        | 0.645    | 0.584      | 0.999 |
| AT1G41880                                      | AT2G20450 | 0            | 0           | 0             | 0.984         | 0.853       | 0.661    | 0.59       | 0.999 |
| AT1G41880                                      | AT3G05560 | 0            | 0           | 0             | 0.984         | 0.82        | 0.645    | 0.269      | 0.999 |
| AT1G41880                                      | AT3G62870 | 0            | 0           | 0             | 0.981         | 0.853       | 0.661    | 0.479      | 0.999 |
| AT1G70600                                      | RPL5B     | 0.19         | 0           | 0             | 0.934         | 0.867       | 0.673    | 0.654      | 0.999 |
| AT1G70600                                      | AT3G09630 | 0.175        | 0           | 0             | 0.92          | 0.867       | 0.904    | 0.507      | 0.999 |
| AT1G70600                                      | RPL23AB   | 0.185        | 0           | 0             | 0.943         | 0.867       | 0.904    | 0.512      | 0.999 |
| AT1G70600                                      | AT4G36130 | 0.171        | 0           | 0             | 0.94          | 0.82        | 0.896    | 0.584      | 0.999 |
| AT1G70600                                      | AT4G10450 | 0.181        | 0           | 0             | 0.933         | 0.847       | 0.899    | 0.464      | 0.999 |
| AT1G70600                                      | AT5G15200 | 0.185        | 0           | 0             | 0.944         | 0.847       | 0.72     | 0.588      | 0.999 |
| AT1G70600                                      | AT3G05560 | 0            | 0           | 0             | 0.943         | 0.847       | 0.899    | 0.517      | 0.999 |
| AT1G70600                                      | AT3G62870 | 0.065        | 0           | 0             | 0.94          | 0.867       | 0.904    | 0.323      | 0.999 |
| AT1G70600                                      | AT2G34480 | 0            | 0           | 0             | 0.938         | 0.82        | 0.896    | 0.643      | 0.999 |
| AT1G70600                                      | AT4G15000 | 0.173        | 0           | 0             | 0.945         | 0.847       | 0.899    | 0.321      | 0.999 |
| AT1G77940                                      | AT4G15000 | 0            | 0           | 0             | 0.982         | 0.82        | 0.645    | 0.543      | 0.999 |
| AT1G77940                                      | RPL18     | 0.19         | 0           | 0             | 0.982         | 0.82        | 0.645    | 0.508      | 0.999 |
| AT1G77940                                      | AT3G62870 | 0            | 0           | 0             | 0.961         | 0.853       | 0.661    | 0.592      | 0.999 |
| AT1G77940                                      | AT3G05560 | 0            | 0           | 0             | 0.982         | 0.82        | 0.645    | 0.566      | 0.999 |
| AT1G77940                                      | AT2G20450 | 0            | 0           | 0             | 0.974         | 0.853       | 0.661    | 0.507      | 0.999 |
| AT1G77940                                      | RPL23AB   | 0            | 0           | 0             | 0.986         | 0.853       | 0.661    | 0.108      | 0.999 |
| AT2G09990                                      | AT4G34670 | 0            | 0           | 0             | 0.929         | 0.867       | 0.965    | 0.46       | 0.999 |
| AT2G09990                                      | AT4G15000 | 0.142        | 0           | 0             | 0.954         | 0.847       | 0.796    | 0.405      | 0.999 |
| AT2G09990                                      | AT5G28060 | 0            | 0           | 0             | 0.934         | 0.867       | 0.965    | 0.584      | 0.999 |
| AT2G09990                                      | AT3G05560 | 0            | 0           | 0             | 0.951         | 0.847       | 0.829    | 0.586      | 0.999 |
| AT2G09990                                      | AT5G15200 | 0.179        | 0           | 0             | 0.968         | 0.847       | 0.964    | 0.369      | 0.999 |
| AT2G09990                                      | AT4G25740 | 0            | 0           | 0             | 0.937         | 0.847       | 0.964    | 0.416      | 0.999 |
| AT2G09990                                      | AT2G34480 | 0            | 0           | 0             | 0.965         | 0.82        | 0.822    | 0.347      | 0.999 |
| AT2G09990                                      | AT5G58420 | 0            | 0           | 0             | 0.934         | 0.847       | 0.964    | 0.59       | 0.999 |
| AT2G09990                                      | AT3G57490 | 0.142        | 0           | 0             | 0.85          | 0.729       | 0.958    | 0.494      | 0.999 |
| AT2G09990                                      | AT4G10450 | 0.175        | 0           | 0             | 0.93          | 0.847       | 0.821    | 0.494      | 0.999 |
| AT2G09990                                      | AT4G30800 | 0.172        | 0           | 0             | 0.911         | 0.847       | 0.964    | 0.512      | 0.999 |
| AT2G09990                                      | AT5G59240 | 0            | 0           | 0             | 0.908         | 0.867       | 0.965    | 0.613      | 0.999 |

| Node 1                                         | Node 2    | Neighborhood | Gene fusion | Co-occurrence | Co-expression | Experiments | Database | Textmining | Score |
|------------------------------------------------|-----------|--------------|-------------|---------------|---------------|-------------|----------|------------|-------|
| TRANSCRIPTION AND TRANSLATION ( <i>Cont.</i> ) |           |              |             |               |               |             |          |            |       |
| AT2G20450                                      | AT4G15000 | 0            | 0           | 0             | 0.986         | 0.867       | 0.673    | 0.601      | 0.999 |
| AT2G20450                                      | AT2G37600 | 0            | 0           | 0             | 0.982         | 0.867       | 0.673    | 0.599      | 0.999 |
| AT2G20450                                      | RPL18     | 0            | 0           | 0             | 0.982         | 0.867       | 0.673    | 0.555      | 0.999 |
| AT2G20450                                      | AT3G05560 | 0            | 0           | 0             | 0.986         | 0.867       | 0.673    | 0.602      | 0.999 |
| AT2G20450                                      | AT5G58420 | 0.176        | 0           | 0             | 0.985         | 0.867       | 0        | 0.464      | 0.999 |
| AT2G20450                                      | AT3G62870 | 0.059        | 0           | 0             | 0.949         | 0.877       | 0.676    | 0.592      | 0.999 |
| AT2G20450                                      | AT2G34480 | 0            | 0           | 0             | 0.967         | 0.853       | 0.661    | 0.591      | 0.999 |
| AT2G20450                                      | AT2G37190 | 0            | 0           | 0             | 0.968         | 0.867       | 0.673    | 0.512      | 0.999 |
| AT2G20450                                      | RPL23AB   | 0.177        | 0           | 0             | 0.986         | 0.877       | 0.676    | 0.835      | 0.999 |
| AT2G20450                                      | AT4G10450 | 0.173        | 0           | 0             | 0.985         | 0.867       | 0.673    | 0.845      | 0.999 |
| AT2G20450                                      | RPL5B     | 0.189        | 0           | 0             | 0.96          | 0.877       | 0.676    | 0.637      | 0.999 |
| AT2G20450                                      | AT3G09630 | 0.142        | 0           | 0             | 0.943         | 0.877       | 0.676    | 0.609      | 0.999 |
| AT2G34480                                      | AT3G05560 | 0            | 0           | 0             | 0.965         | 0.82        | 0.896    | 0.632      | 0.999 |
| AT2G34480                                      | AT5G15200 | 0            | 0           | 0             | 0.985         | 0.82        | 0.72     | 0.059      | 0.999 |
| AT2G34480                                      | AT3G62870 | 0            | 0           | 0             | 0.986         | 0.853       | 0.901    | 0.696      | 0.999 |
| AT2G34480                                      | AT4G34670 | 0            | 0           | 0             | 0.977         | 0.853       | 0.72     | 0.056      | 0.999 |
| AT2G34480                                      | RPL18     | 0            | 0           | 0             | 0.985         | 0.82        | 0.645    | 0.225      | 0.999 |
| AT2G34480                                      | AT4G15000 | 0            | 0           | 0             | 0.985         | 0.82        | 0.896    | 0.244      | 0.999 |
| AT2G34480                                      | AT3G09630 | 0            | 0           | 0             | 0.982         | 0.853       | 0.901    | 0.718      | 0.999 |
| AT2G34480                                      | RPL23AB   | 0            | 0           | 0             | 0.969         | 0.853       | 0.901    | 0.477      | 0.999 |
| AT2G34480                                      | AT2G37190 | 0.182        | 0           | 0             | 0.982         | 0.82        | 0.645    | 0.352      | 0.999 |
| AT2G34480                                      | AT4G10450 | 0            | 0           | 0             | 0.938         | 0.82        | 0.896    | 0.734      | 0.999 |
| AT2G37190                                      | AT4G10450 | 0.178        | 0           | 0.241         | 0.951         | 0.847       | 0.656    | 0.569      | 0.999 |
| AT2G37190                                      | RPL23AB   | 0.182        | 0           | 0.203         | 0.982         | 0.867       | 0.673    | 0.517      | 0.999 |
| AT2G37190                                      | AT3G09630 | 0.172        | 0           | 0             | 0.944         | 0.867       | 0.673    | 0.595      | 0.999 |
| AT2G37190                                      | RPL5B     | 0.19         | 0           | 0             | 0.968         | 0.867       | 0.673    | 0.6        | 0.999 |
| AT2G37190                                      | RPL18     | 0            | 0           | 0             | 0.982         | 0.847       | 0.656    | 0.383      | 0.999 |
| AT2G37190                                      | AT4G15000 | 0            | 0           | 0             | 0.985         | 0.847       | 0.656    | 0.544      | 0.999 |
| AT2G37190                                      | AT3G62870 | 0.059        | 0           | 0             | 0.985         | 0.867       | 0.673    | 0.61       | 0.999 |
| AT2G37190                                      | AT3G05560 | 0            | 0           | 0             | 0.984         | 0.847       | 0.656    | 0.594      | 0.999 |
| AT2G37190                                      | AT5G28060 | 0            | 0           | 0.224         | 0.982         | 0.867       | 0        | 0.564      | 0.999 |
| AT2G37600                                      | RPL23AB   | 0            | 0           | 0             | 0.982         | 0.867       | 0.673    | 0.595      | 0.999 |
| AT2G37600                                      | AT4G10450 | 0            | 0           | 0             | 0.982         | 0.847       | 0.656    | 0.764      | 0.999 |

| Node 1                                         | Node 2    | Neighborhood | Gene fusion | Co-occurrence | Co-expression | Experiments | Database | Textmining | Score |
|------------------------------------------------|-----------|--------------|-------------|---------------|---------------|-------------|----------|------------|-------|
| TRANSCRIPTION AND TRANSLATION ( <i>Cont.</i> ) |           |              |             |               |               |             |          |            |       |
| AT2G37600                                      | AT4G15000 | 0            | 0           | 0             | 0.982         | 0.847       | 0.656    | 0.595      | 0.999 |
| AT2G37600                                      | RPL18     | 0            | 0           | 0             | 0.966         | 0.847       | 0.656    | 0.835      | 0.999 |
| AT2G43030                                      | RPS9      | 0.19         | 0           | 0.242         | 0.982         | 0.876       | 0        | 0.544      | 0.999 |
| AT2G43030                                      | AT4G01310 | 0.185        | 0           | 0.311         | 0.986         | 0.898       | 0.424    | 0.287      | 0.999 |
| AT3G05560                                      | AT4G15000 | 0            | 0           | 0             | 0.986         | 0.847       | 0.899    | 0.896      | 0.999 |
| AT3G05560                                      | RPL18     | 0            | 0           | 0             | 0.975         | 0.847       | 0.656    | 0.574      | 0.999 |
| AT3G05560                                      | AT3G62870 | 0            | 0           | 0             | 0.982         | 0.867       | 0.904    | 0.308      | 0.999 |
| AT3G05560                                      | AT5G15200 | 0            | 0           | 0             | 0.976         | 0.847       | 0.72     | 0.596      | 0.999 |
| AT3G05560                                      | AT5G28060 | 0            | 0           | 0             | 0.95          | 0.867       | 0.72     | 0.585      | 0.999 |
| AT3G05560                                      | AT4G10450 | 0            | 0           | 0             | 0.982         | 0.847       | 0.899    | 0.588      | 0.999 |
| AT3G05560                                      | AT4G36130 | 0            | 0           | 0             | 0.938         | 0.82        | 0.896    | 0.33       | 0.999 |
| AT3G05560                                      | RPL23AB   | 0            | 0           | 0             | 0.986         | 0.867       | 0.904    | 0.727      | 0.999 |
| AT3G05560                                      | AT3G09630 | 0            | 0           | 0             | 0.961         | 0.867       | 0.904    | 0.607      | 0.999 |
| AT3G05560                                      | RPL5B     | 0            | 0           | 0             | 0.968         | 0.867       | 0.673    | 0.615      | 0.999 |
| AT3G09630                                      | RPL18     | 0.184        | 0           | 0             | 0.985         | 0.867       | 0.673    | 0.598      | 0.999 |
| AT3G09630                                      | RPL23AB   | 0.179        | 0           | 0.228         | 0.936         | 0.877       | 0.905    | 0.383      | 0.999 |
| AT3G09630                                      | AT4G36130 | 0.121        | 0           | 0.234         | 0.939         | 0.853       | 0.901    | 0.602      | 0.999 |
| AT3G09630                                      | AT4G10450 | 0.175        | 0           | 0.248         | 0.934         | 0.867       | 0.904    | 0.819      | 0.999 |
| AT3G09630                                      | RPL5B     | 0.19         | 0           | 0             | 0.955         | 0.877       | 0.676    | 0.653      | 0.999 |
| AT3G09630                                      | AT4G34670 | 0            | 0           | 0.345         | 0.957         | 0.877       | 0.838    | 0.602      | 0.999 |
| AT3G09630                                      | AT4G15000 | 0.142        | 0           | 0             | 0.95          | 0.867       | 0.904    | 0.509      | 0.999 |
| AT3G09630                                      | AT5G15200 | 0.179        | 0           | 0             | 0.968         | 0.867       | 0.822    | 0.587      | 0.999 |
| AT3G09630                                      | AT5G28060 | 0            | 0           | 0             | 0.925         | 0.877       | 0.838    | 0.516      | 0.999 |
| AT3G09630                                      | AT3G62870 | 0.121        | 0           | 0             | 0.976         | 0.877       | 0.905    | 0.838      | 0.999 |
| AT3G09630                                      | AT5G58420 | 0            | 0           | 0.391         | 0.982         | 0.867       | 0.419    | 0.587      | 0.999 |
| AT3G52580                                      | PFL       | 0.181        | 0           | 0             | 0.979         | 0.774       | 0.638    | 0.517      | 0.999 |
| AT3G52580                                      | RPS20A    | 0.185        | 0           | 0             | 0.984         | 0.82        | 0.642    | 0.585      | 0.999 |
| AT3G52580                                      | AT4G15000 | 0.173        | 0           | 0             | 0.982         | 0.847       | 0.254    | 0.512      | 0.999 |
| AT3G52580                                      | AT5G15200 | 0.185        | 0           | 0             | 0.954         | 0.847       | 0.654    | 0.598      | 0.999 |
| AT3G52580                                      | AT4G25740 | 0            | 0           | 0             | 0.96          | 0.847       | 0.655    | 0.596      | 0.999 |
| AT3G52580                                      | AT5G58420 | 0            | 0           | 0.291         | 0.982         | 0.847       | 0.654    | 0.417      | 0.999 |
| AT3G52580                                      | RPL23AB   | 0.185        | 0           | 0.273         | 0.984         | 0.867       | 0.257    | 0.417      | 0.999 |
| AT3G57490                                      | AT4G34670 | 0            | 0           | 0.304         | 0.912         | 0.785       | 0.962    | 0.355      | 0.999 |

| Node 1                                         | Node 2    | Neighborhood | Gene fusion | Co-occurrence | Co-expression | Experiments | Database | Textmining | Score |
|------------------------------------------------|-----------|--------------|-------------|---------------|---------------|-------------|----------|------------|-------|
| TRANSCRIPTION AND TRANSLATION ( <i>Cont.</i> ) |           |              |             |               |               |             |          |            |       |
| AT3G57490                                      | AT5G58420 | 0.182        | 0           | 0.331         | 0.903         | 0.729       | 0.958    | 0.476      | 0.999 |
| AT3G57490                                      | AT4G25740 | 0            | 0           | 0             | 0.859         | 0.729       | 0.958    | 0.496      | 0.999 |
| AT3G57490                                      | AT5G15200 | 0.177        | 0           | 0             | 0.85          | 0.729       | 0.958    | 0.476      | 0.999 |
| AT3G57490                                      | AT5G28060 | 0            | 0           | 0             | 0.908         | 0.785       | 0.962    | 0.518      | 0.999 |
| AT3G57490                                      | AT5G59240 | 0            | 0           | 0             | 0.912         | 0.785       | 0.962    | 0.558      | 0.999 |
| AT3G57490                                      | AT4G30800 | 0.162        | 0           | 0             | 0.893         | 0.729       | 0.958    | 0.489      | 0.999 |
| AT3G62870                                      | RPL18     | 0.149        | 0           | 0             | 0.986         | 0.867       | 0.673    | 0.547      | 0.999 |
| AT3G62870                                      | RPL23AB   | 0.175        | 0           | 0             | 0.973         | 0.877       | 0.905    | 0.326      | 0.999 |
| AT3G62870                                      | AT5G28060 | 0            | 0           | 0             | 0.951         | 0.877       | 0.835    | 0.593      | 0.999 |
| AT3G62870                                      | AT5G15200 | 0.174        | 0           | 0             | 0.984         | 0.867       | 0.821    | 0.163      | 0.999 |
| AT3G62870                                      | AT5G58420 | 0            | 0           | 0             | 0.985         | 0.867       | 0.394    | 0.582      | 0.999 |
| AT3G62870                                      | AT4G34670 | 0            | 0           | 0             | 0.984         | 0.877       | 0.835    | 0.604      | 0.999 |
| AT3G62870                                      | AT4G15000 | 0.059        | 0           | 0             | 0.973         | 0.867       | 0.904    | 0.367      | 0.999 |
| AT3G62870                                      | RPL5B     | 0.131        | 0           | 0             | 0.964         | 0.877       | 0.676    | 0.646      | 0.999 |
| AT3G62870                                      | AT4G10450 | 0.078        | 0           | 0             | 0.941         | 0.867       | 0.904    | 0.644      | 0.999 |
| AT3G62870                                      | AT4G36130 | 0.104        | 0           | 0             | 0.941         | 0.853       | 0.901    | 0.518      | 0.999 |
| AT4G01310                                      | RPS9      | 0.19         | 0           | 0.338         | 0.986         | 0.883       | 0        | 0.755      | 0.999 |
| AT4G10450                                      | RPL23AB   | 0.185        | 0           | 0.351         | 0.985         | 0.867       | 0.904    | 0.49       | 0.999 |
| AT4G10450                                      | AT5G15200 | 0.185        | 0           | 0             | 0.949         | 0.847       | 0.72     | 0.595      | 0.999 |
| AT4G10450                                      | AT5G28060 | 0            | 0           | 0             | 0.955         | 0.867       | 0.72     | 0.568      | 0.999 |
| AT4G10450                                      | AT4G15000 | 0.173        | 0           | 0             | 0.983         | 0.847       | 0.899    | 0.521      | 0.999 |
| AT4G10450                                      | RPL5B     | 0.19         | 0           | 0             | 0.949         | 0.867       | 0.673    | 0.559      | 0.999 |
| AT4G10450                                      | AT4G36130 | 0.171        | 0           | 0.315         | 0.925         | 0.82        | 0.896    | 0.544      | 0.999 |
| AT4G15000                                      | RPL18     | 0            | 0           | 0             | 0.985         | 0.847       | 0.656    | 0.596      | 0.999 |
| AT4G15000                                      | RPL23AB   | 0.177        | 0           | 0             | 0.986         | 0.867       | 0.904    | 0.581      | 0.999 |
| AT4G15000                                      | RPL5B     | 0.189        | 0           | 0             | 0.968         | 0.867       | 0.673    | 0.602      | 0.999 |
| AT4G15000                                      | AT4G36130 | 0.109        | 0           | 0             | 0.937         | 0.82        | 0.896    | 0.414      | 0.999 |
| AT4G15000                                      | AT5G28060 | 0            | 0           | 0             | 0.982         | 0.867       | 0.72     | 0.609      | 0.999 |
| AT4G15000                                      | AT5G15200 | 0.177        | 0           | 0             | 0.983         | 0.847       | 0.72     | 0.515      | 0.999 |
| AT4G15000                                      | AT4G34670 | 0            | 0           | 0             | 0.944         | 0.867       | 0.72     | 0.601      | 0.999 |
| AT4G25740                                      | PFL       | 0            | 0           | 0             | 0.952         | 0.774       | 0.638    | 0.787      | 0.999 |
| AT4G25740                                      | AT4G34670 | 0            | 0           | 0             | 0.928         | 0.867       | 0.965    | 0.613      | 0.999 |
| AT4G25740                                      | AT5G15200 | 0            | 0           | 0             | 0.949         | 0.847       | 0.964    | 0.655      | 0.999 |

| Node 1                                         | Node 2    | Neighborhood | Gene fusion | Co-occurrence | Co-expression | Experiments | Database | Textmining | Score |
|------------------------------------------------|-----------|--------------|-------------|---------------|---------------|-------------|----------|------------|-------|
| TRANSCRIPTION AND TRANSLATION ( <i>Cont.</i> ) |           |              |             |               |               |             |          |            |       |
| AT4G25740                                      | AT5G28060 | 0            | 0           | 0             | 0.928         | 0.867       | 0.965    | 0.856      | 0.999 |
| AT4G25740                                      | AT5G58420 | 0            | 0           | 0             | 0.94          | 0.847       | 0.964    | 0.462      | 0.999 |
| AT4G25740                                      | AT4G30800 | 0            | 0           | 0             | 0.926         | 0.847       | 0.964    | 0.592      | 0.999 |
| AT4G25740                                      | AT5G59240 | 0            | 0           | 0             | 0.91          | 0.867       | 0.965    | 0.602      | 0.999 |
| AT4G30800                                      | AT5G59240 | 0            | 0           | 0             | 0.926         | 0.867       | 0.965    | 0.605      | 0.999 |
| AT4G30800                                      | AT5G15200 | 0.182        | 0           | 0.223         | 0.926         | 0.847       | 0.964    | 0.486      | 0.999 |
| AT4G30800                                      | AT5G28060 | 0            | 0           | 0             | 0.92          | 0.867       | 0.965    | 0.6        | 0.999 |
| AT4G30800                                      | AT5G58420 | 0.187        | 0           | 0.321         | 0.939         | 0.847       | 0.964    | 0.349      | 0.999 |
| AT4G30800                                      | AT4G34670 | 0            | 0           | 0             | 0.916         | 0.867       | 0.965    | 0.614      | 0.999 |
| AT4G34670                                      | RPL23AB   | 0            | 0           | 0.239         | 0.934         | 0.877       | 0.72     | 0.544      | 0.999 |
| AT4G34670                                      | AT5G58420 | 0            | 0           | 0.375         | 0.959         | 0.867       | 0.965    | 0.545      | 0.999 |
| AT4G34670                                      | AT5G28060 | 0.059        | 0           | 0             | 0.947         | 0.877       | 0.966    | 0.602      | 0.999 |
| AT4G34670                                      | AT5G15200 | 0            | 0           | 0             | 0.968         | 0.867       | 0.965    | 0.592      | 0.999 |
| AT4G34670                                      | AT5G59240 | 0            | 0           | 0.223         | 0.907         | 0.877       | 0.966    | 0.661      | 0.999 |
| AT4G36130                                      | RPL23AB   | 0.175        | 0           | 0.281         | 0.931         | 0.853       | 0.901    | 0.497      | 0.999 |
| AT5G15200                                      | PFL       | 0.185        | 0           | 0             | 0.979         | 0.774       | 0.638    | 0.507      | 0.999 |
| AT5G15200                                      | RPL18     | 0.19         | 0           | 0             | 0.986         | 0.847       | 0        | 0.547      | 0.999 |
| AT5G15200                                      | AT5G28060 | 0            | 0           | 0             | 0.955         | 0.867       | 0.965    | 0.155      | 0.999 |
| AT5G15200                                      | AT5G58420 | 0            | 0           | 0             | 0.963         | 0.847       | 0.964    | 0.68       | 0.999 |
| AT5G15200                                      | AT5G59240 | 0            | 0           | 0             | 0.908         | 0.867       | 0.965    | 0.589      | 0.999 |
| AT5G28060                                      | PFL       | 0            | 0           | 0             | 0.982         | 0.841       | 0.652    | 0.589      | 0.999 |
| AT5G28060                                      | RPS20A    | 0            | 0           | 0             | 0.968         | 0.853       | 0.661    | 0.592      | 0.999 |
| AT5G28060                                      | RPL23AB   | 0            | 0           | 0             | 0.972         | 0.877       | 0.72     | 0.712      | 0.999 |
| AT5G28060                                      | AT5G58420 | 0            | 0           | 0             | 0.962         | 0.867       | 0.965    | 0.509      | 0.999 |
| AT5G28060                                      | AT5G59240 | 0            | 0           | 0             | 0.906         | 0.877       | 0.966    | 0.668      | 0.999 |
| AT5G58420                                      | PFL       | 0            | 0           | 0             | 0.983         | 0.774       | 0.638    | 0.677      | 0.999 |
| AT5G58420                                      | RPL23AB   | 0.19         | 0           | 0.309         | 0.986         | 0.867       | 0        | 0.417      | 0.999 |
| AT5G58420                                      | AT5G59240 | 0            | 0           | 0.257         | 0.919         | 0.867       | 0.965    | 0.59       | 0.999 |
| PFL                                            | RPL23AB   | 0.185        | 0           | 0             | 0.984         | 0.841       | 0        | 0.691      | 0.999 |
| RPL18                                          | RPL23AB   | 0            | 0           | 0             | 0.983         | 0.867       | 0.673    | 0.355      | 0.999 |
| RPL18                                          | RPL5B     | 0            | 0           | 0             | 0.982         | 0.867       | 0.673    | 0.597      | 0.999 |
| RPL23AB                                        | RPL5B     | 0.19         | 0           | 0             | 0.968         | 0.877       | 0.676    | 0.629      | 0.999 |

| Node 1           | Node 2           | Neighborhood | Gene fusion | Co-occurrence | Co-expression | Experiments | Database | Textmining | Score |
|------------------|------------------|--------------|-------------|---------------|---------------|-------------|----------|------------|-------|
| TRANSPORT        |                  |              |             |               |               |             |          |            |       |
| <i>AT1G62020</i> | <i>AT5G05010</i> | 0            | 0           | 0             | 0.921         | 0.969       | 0.846    | 0.73       | 0.999 |
| <i>AT1G62020</i> | <i>AT4G34450</i> | 0            | 0           | 0             | 0.928         | 0.874       | 0.844    | 0.671      | 0.999 |
| <i>AT4G34450</i> | <i>AT5G05010</i> | 0            | 0           | 0             | 0.922         | 0.886       | 0.846    | 0.73       | 0.999 |
